# Supplementary material for: A Novel Molecularly Imprinted Quartz Crystal Microbalance Sensor Based on Erbium Molybdate Incorporating Sulfur-Doped Graphitic Carbon Nitride for Dimethoate Determination in Apple Juice Samples
Source: MDPI journal article supplement (doi:10.3390/foods13050810), 2024-03-06
Supplement: s1 [file s1]

## Supplementary Data

For

### **A novel molecularly imprinted quartz crystal microbalance sensor based on erbium molybdate incorporating sulphur-doped graphitic carbon nitride for dimethoate determination in apple juice samples**

Neslihan Özdemir<sup>1</sup>, Betül Karşlıoğlu<sup>2</sup>, Bahar Bankoğlu Yola<sup>3</sup>, Necip Atar<sup>4</sup>, Mehmet Lütfi Yola<sup>5\*</sup>

<sup>1</sup>*Department of Machinery and Metal Technologies, Merzifon Vocational School, Amasya University, Amasya, 05300, Turkey; neslihan.ozdemir@amasya.edu.tr*

<sup>2</sup>*Department of Gastronomy and Culinary Arts, Faculty of Tourism, Hasan Kalyoncu University, Gaziantep, 27000, Turkey; betul.kokay@hku.edu.tr*

<sup>3</sup>*Department of Engineering Basic Sciences, Faculty of Engineering and Natural Sciences, Gaziantep Islam Science and Technology University, Gaziantep, 27000, Turkey; bahar.bankogluYola@gibtu.edu.tr*

<sup>4</sup>*Department of Chemical Engineering, Faculty of Engineering, Pamukkale University, Denizli, 20160, Turkey; natar@pau.edu.tr*

<sup>5</sup>*Department of Nutrition and Dietetics, Faculty of Health Sciences, Hasan Kalyoncu University, Gaziantep, 27000, Turkey*

*\*Correspondence: mlutfi.yola@hku.edu.tr; Tel.: +90-3422118080; Fax: +90-3422118081*

## **Instrumentation**

Some analytical devices for the morphological analyzes such as ZEISS EVO 50 SEM (Tokyo, Japan) for field emission scanning electron microscopy (FESEM), JEOL 2100 TEM/HRTEM instrument for transmission electron microscopy (TEM), Rikagu Miniflex, x-ray diffractometer (Tokyo, Japan) for x-ray diffraction analysis (XRD), Bruker-Tensor 27 FTIR spectrometer (Tokyo, Japan) for fourier-transform infrared spectroscopy (FTIR), PHI 5000 Versa Probe type x-ray photoelectron spectrometer (Japan/USA) for x-ray photoelectron spectroscopy (XPS), AFM Park NX10 (Japan) for atomic force microscopy (AFM), Thermo Fisher Scientific UV-Vis/Vis instrumentation for UV-Vis spectra, GAMRY Reference 600 workstation for electrochemical impedance spectroscopy (EIS), and cyclic voltammetry (CV) were applied in present study.

## **Sensitivity**

$$LOQ = 10.0 S / m$$

$$LOD = 3.3 S / m$$

S: Standard deviation of the intercept and m: Slope of the regression line

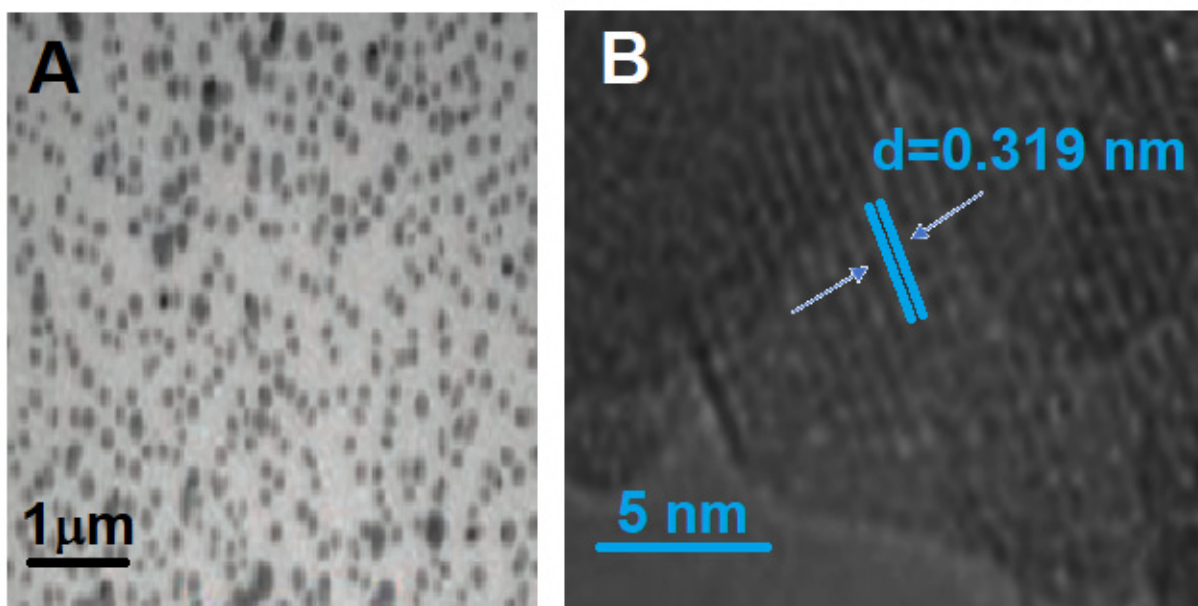

**Figure S1.** TEM image (A) of EM/S-g-C<sub>3</sub>N<sub>4</sub> nanocomposite and HRTEM image (B) of EM/S-g-C<sub>3</sub>N<sub>4</sub> nanocomposite

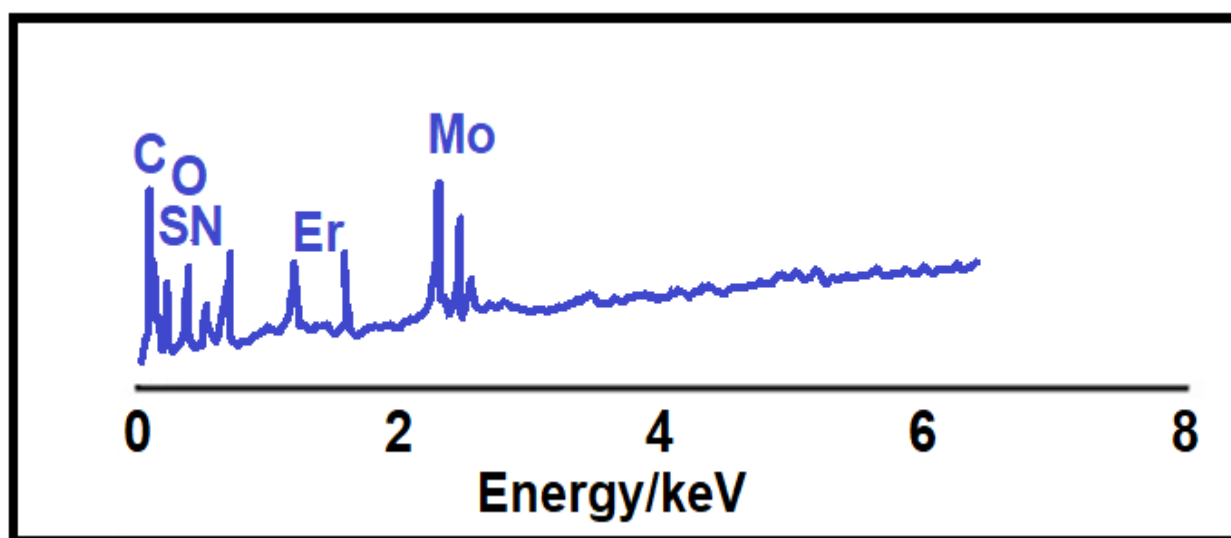

**Figure S2.** EDX spectrum of of EM/S-g-C<sub>3</sub>N<sub>4</sub> nanocomposite

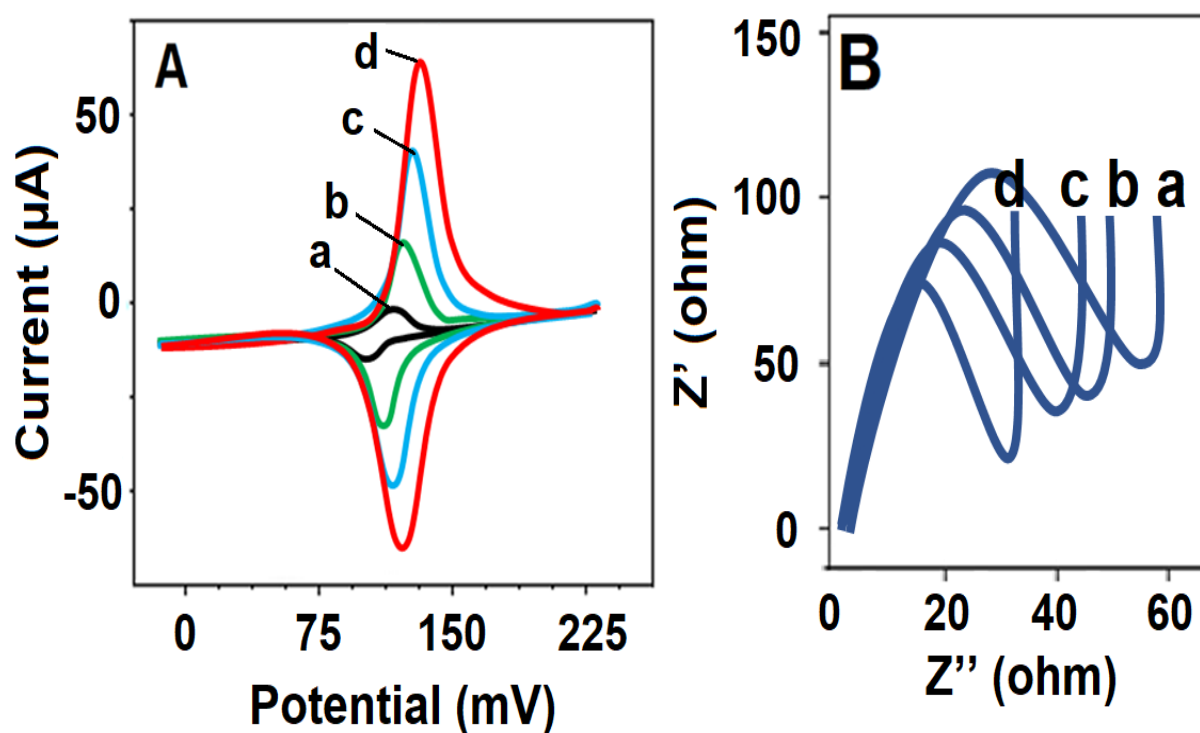

**Figure S3.** (A) CV curves and (B) EIS responses at (a) bare GCE, (b) EM/GCE, (c) S-g-C<sub>3</sub>N<sub>4</sub>/GCE, (d) EM/S-g-C<sub>3</sub>N<sub>4</sub>/GCE (Redox probe: 1.0 mM [Fe(CN)<sub>6</sub>]<sup>3-/4-</sup> containing 0.1 M KCl, potential scan rate: 50 mV/s)

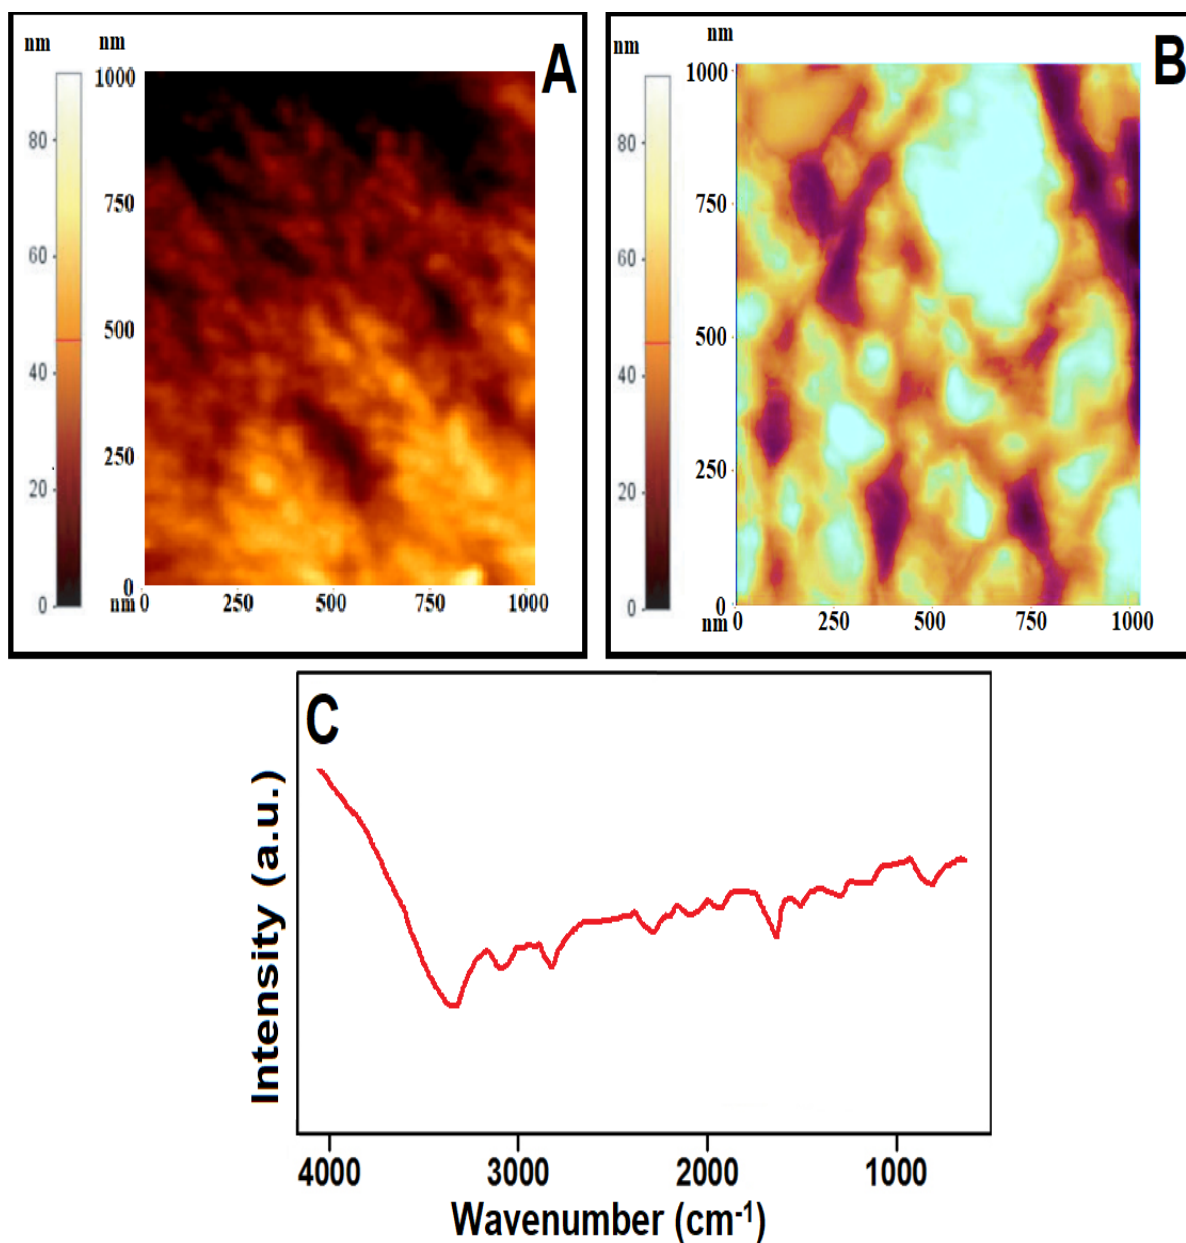

**Figure S4.** AFM images of (A) bare QCM chip, (B) the molecularly imprinted film on EM/S-g-C<sub>3</sub>N<sub>4</sub>/QCM and (C) FTIR spectrum of molecularly imprinted film on EM/S-g-C<sub>3</sub>N<sub>4</sub>/QCM

**Table S1.** Recovery results of DIM ( $n=6$ )

| Sample      | Added DIM (nM) | Found DIM (nM)  | Recovery (%)      |
|-------------|----------------|-----------------|-------------------|
| Apple Juice | -              | $0.64 \pm 0.01$ | -                 |
|             | 2.00           | $2.63 \pm 0.03$ | $99.62 \pm 0.08$  |
|             | 4.00           | $4.65 \pm 0.09$ | $100.22 \pm 0.03$ |
|             | 6.00           | $6.65 \pm 0.07$ | $100.15 \pm 0.05$ |

Recovery = Found DIM, nM / Real DIM, nM

**Table S2.**  $k$  and  $k'$  values of DIM imprinted QCM chips (MIP/EM/S-g-C<sub>3</sub>N<sub>4</sub>/QCM and NIP/EM/S-g-C<sub>3</sub>N<sub>4</sub>/QCM) ( $n=6$ )

|     | MIP                               |        | NIP                               |        | $k'$ |
|-----|-----------------------------------|--------|-----------------------------------|--------|------|
|     | $\Delta m$ (nM cm <sup>2</sup> -) | $k$    | $\Delta m$ (nM cm <sup>2</sup> -) | $k$    |      |
| DIM | $20.15 \pm 0.01$                  | -      | $1.05 \pm 0.03$                   | -      | -    |
| ACE | $0.50 \pm 0.03$                   | 40.30  | $0.25 \pm 0.02$                   | 4.20   | 9.60 |
| TRI | $0.40 \pm 0.07$                   | 50.38  | $0.20 \pm 0.04$                   | 5.25   | 9.60 |
| HEX | $0.30 \pm 0.08$                   | 67.17  | $0.10 \pm 0.07$                   | 10.50  | 6.40 |
| FEN | $0.20 \pm 0.09$                   | 100.75 | $0.05 \pm 0.06$                   | 21.00  | 4.80 |
| DDT | $0.10 \pm 0.05$                   | 201.50 | $0.01 \pm 0.06$                   | 105.00 | 1.92 |

Analyte concentrations: 10.0 nM DIM, 1000.0 nM ACE, 1000.0 nM TRI, 1000.0 nM HEX, 1000.0 nM FEN, 1000.0 nM DDT

$k = \Delta m_{\text{DIM}} / \Delta m_{\text{interfering chemical}}$  and  $k' = k_{\text{MIP}} / k_{\text{NIP}}$
